# Supplementary material
Source: publisher figshare collection journal article supplement (https://karger.figshare.com/ndownloader/files/14522759)
Supplement: Supplementary file 1 [file 14522759]

**APPENDIX**

**PROP Investigators and Study Sites**

*Cincinnati Children’s Hospital Medical Center:*Barbara Alexander, RN; Claire Chougnet, PhD; Tari Gratton, PA; James M. Greenberg, MD Cathy Grisby, BSN, CCRCl William Hardie, MD; Alan H. Jobe MD, PhD; Beth Koch, BHS, RRT, RPFT; Karen McDowell, MD; Kelly Thornton BS

*Washington University:* Pamela Bates, CRT, RPFT, RPSGT; Claudia Cleveland, RRT; Thomas Ferkol, MD; Aaron Hamvas, MD; Julie Hoffmann, RN; Mark R. Holland, PhD; James Kemp, MD; Philip T. Levy, MD; Laura Linneman, RN; Jayne Sicard-Su, RN; Gina Simpson, RRT, CPFT; Gautam K. Singh, MD; Barbara Warner, MD. T, CPFT Gautam K. Singh, MD Barbara Warner, MD

*University of California at San Francisco:* Jeanette M. Asselin, MS, RRT-NPS; Samantha Balan; Philip L. Ballard, MD, PhD; Roberta A. Ballard, MD; Katrina Burson, RN, BSN; Cheryl Chapin; Eric C. Eichenwald, MD; Roberta L. Keller, MD; Amir M. Khan, MD; Leslie Lusk, MD; Dennis W. Nielson, MD, PhD; Elizabeth E. Rogers, MD

*Vanderbilt University:* Judy Aschner, MD; Amy B Beller BSN; Candice Fike, MD; Scott Guthrie, MD; Tina Hartert, MD; Nathalie Maitre, MD; Paul Moore, MD; Mark O’ Hunt; Theresa J. Rogers, RN; Odessa L. Settles, RN, MSN, CM; Steven Steele, RN; Marshall Summar, MD; Sharon Wadley, BSN, RN, CLS

*Rochester-Buffalo:* Kim Bordeaux, RRT; Pam Brown, RRT; Shannon Castiglione, RN; Carl D’Angio, MD; Julia Epping, AAS, RT; Lisa Flattery-Walsh, RRT; Donna Germuga, RRT, CPFT; Aimee Horan, LPN; Heidie Huyck, BS; Nancy Jenks, RN; Vasanth Kumar, MD; Valerie Lunger, MS; Deanna Maffet, RN; Tom Mariani, PhD; Jane O’Donnell, PNP; Mary Platt, RN; Eileen Popplewell, RRT; Sandra Prentice, CRT; Gloria Pryhuber, MD; Clement Ren, MD; Anne Marie Reynolds, MD, MPH Rita M. Ryan, MD; Michael Sacilowski, MAT; Tanya Scalise, RN, BSN; Kristin Scheible, MD; Timothy Stevens, MD, MPH; Elizabeth Werner, MPH; Jason Zayac, BS

*Duke University:* Kim Ciccio, RN; C. Michael Cotten, MD; Kim Fisher, PhD; Jack Sharp, MD; Judith A. Voynow, MD

*Indiana University:* Charles Clem, RRT; Stephanie Davis, MD; Susan Gunn, NNP, CCRC; Lauren Jewett, RN, CCRC; Brenda Poindexter, MD, MS

*Steering Committee Chair:* Lynn M. Taussig, MD, University of Denver

*NHLBI Program Officer:* Carol J. Blaisdell, MD

*University of Pennsylvania Data Coordinating Center:* Maria Blanco, BS; Denise Cifelli, MS; Jonas Ellenberg, PhD; Rui Feng, PhD; Howard Panitch, MD; Pamela Shaw, PhD; Ann Tierney, BA, MS
